# Supplementary material
Source: PubMed Central journal article supplement (PMC6161491)
Supplement: NIHMS1503448-supplement-2.pdf [file NIHMS1503448-supplement-2.pdf]

**Supplementary Table S1. Demographic and clinical information for FXS and control participants.**

(corresponds to data in Fig. 6)

|                                                                      | <b>FXS<br/>(n = 8)</b> | <b>Control<br/>(n = 8)</b> |
|----------------------------------------------------------------------|------------------------|----------------------------|
| <b>Age in years</b><br><i>Range</i>                                  | 30.1 (10.3)<br>15-40   | 29.2 (9.6)<br>15-40        |
| <b>Abbreviated IQ</b><br><i>Range</i>                                | 52.3 (5.8)<br>47-61    |                            |
| <b>SCQ</b><br><i>Range</i>                                           | 12.8 (4.8)<br>7-18     |                            |
| <b>Sensory Profile:<br/>Seeking/Seeker</b><br><i>Range</i>           | 25.1 (12.3)<br>3-41    |                            |
| <b>Sensory Profile:<br/>Avoiding/Avoider</b><br><i>Range</i>         | 44.8 (20.0)<br>20-71   |                            |
| <b>Sensory Profile:<br/>Sensitivity/Sensor</b><br><i>Range</i>       | 40.4 (20.9)<br>11-68   |                            |
| <b>Sensory Profile:<br/>Registration/Bystander</b><br><i>Range</i>   | 38.3 (21.7)<br>9-74    |                            |
| <b>Sensory Profile:<br/>Auditory Processing</b><br><i>Range</i>      | 19.7 (9.2)<br>6-36     |                            |
| <b>Sensory Profile:<br/>Visual Processing</b><br><i>Range</i>        | 11.4 (6.9)<br>1-20     |                            |
| <b>Sensory Profile:<br/>Touch Processing</b><br><i>Range</i>         | 16.1 (11.8)<br>2-35    |                            |
| <b>Sensory Profile:<br/>Movement Processing</b><br><i>Range</i>      | 8.8 (3.2)<br>2-13      |                            |
| <b>Sensory Profile:<br/>Body Position Processing</b><br><i>Range</i> | 15.0 (12.0)<br>1-35    |                            |
| <b>Sensory Profile:<br/>Oral Sensory Processing</b><br><i>Range</i>  | 12.1 (9.8)<br>0-30     |                            |

Mean (standard deviation)  
IQ = intelligence quotient

**Supplementary Table S2. Medication type by FXS participant.**

(corresponds to data in Fig. 6)

| Participant/<br>Drug class | AA | AD | SH | ST |
|----------------------------|----|----|----|----|
| FXS 1                      |    |    | x  |    |
| FXS 2                      |    |    |    |    |
| FXS 3                      |    | x  |    |    |
| FXS 4                      | x  | x  |    |    |
| FXS 5                      | x  | x  |    | x  |
| FXS 6                      | x  | x  | x  |    |
| FXS 7                      |    | x  |    | x  |
| FXS 8                      |    |    |    | x  |

'x' indicates the participant was taking medication within 48 hours of testing, empty cell indicates no medication

AA: atypical antipsychotic; AD: antidepressant (all SSRI, with exception of FXS 6 who was taking tricyclic); SH: Sedative-Hypnotic ST: stimulant
